# Supplementary material
Source: PubMed Central journal article supplement (PMC4677898)
Supplement: supp_pp.15.01040_PP2015-01040R2_Supplemental_Material.pdf [file supp_pp.15.01040_PP2015-01040R2_Supplemental_Material.pdf]

1 **Supplemental Material**

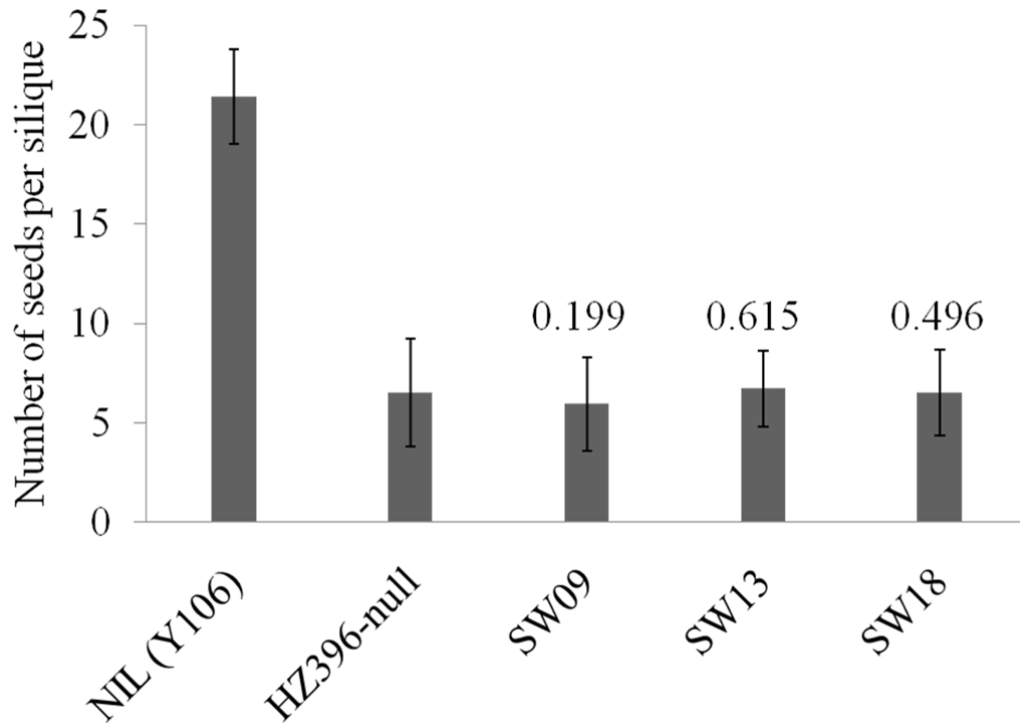

2

3 **Supplementary Figure S1.** Number of seeds per silique in NIL(Y106), HZ396-null  
4 and *BnaC9.RING*-transgenic T<sub>0</sub> lines. A two-tailed Student's t test between  
5 HZ396-null and *BnaC9.RING*-transgenic plants was used to generate the P value.

6 Error bars represent the standard deviations.

7

8

9

10

11

12

13

14

15

16

17



---

23 *Brassica oleracea* BolC9.SMG7b (Bol043637), *Brassica napus* BnaA2.SMG7  
24 (BnaA02g04210D), *Brassica napus* BnaA10.SMG7 (BnaA10g15730D), *Brassica*  
25 *napus* BnaC2.SMG7 (BnaC02g44260D), *Brassica napus* BnaC9.SMG7a  
26 (BnaC09g38310D), *Brassica napus* BnaC9.SMG7b (BnaC09g45890D) and *Brassica*  
27 *napus* BnaC9.SMG7c (BnaC09g45900D). The alignment of SMG7 amino acid  
28 sequences was performed with Geneious 4.8.3. Gray bars represent the conserved  
29 EST-TPR or EST-CD domain.

30

31

32

33

34

35

36

37

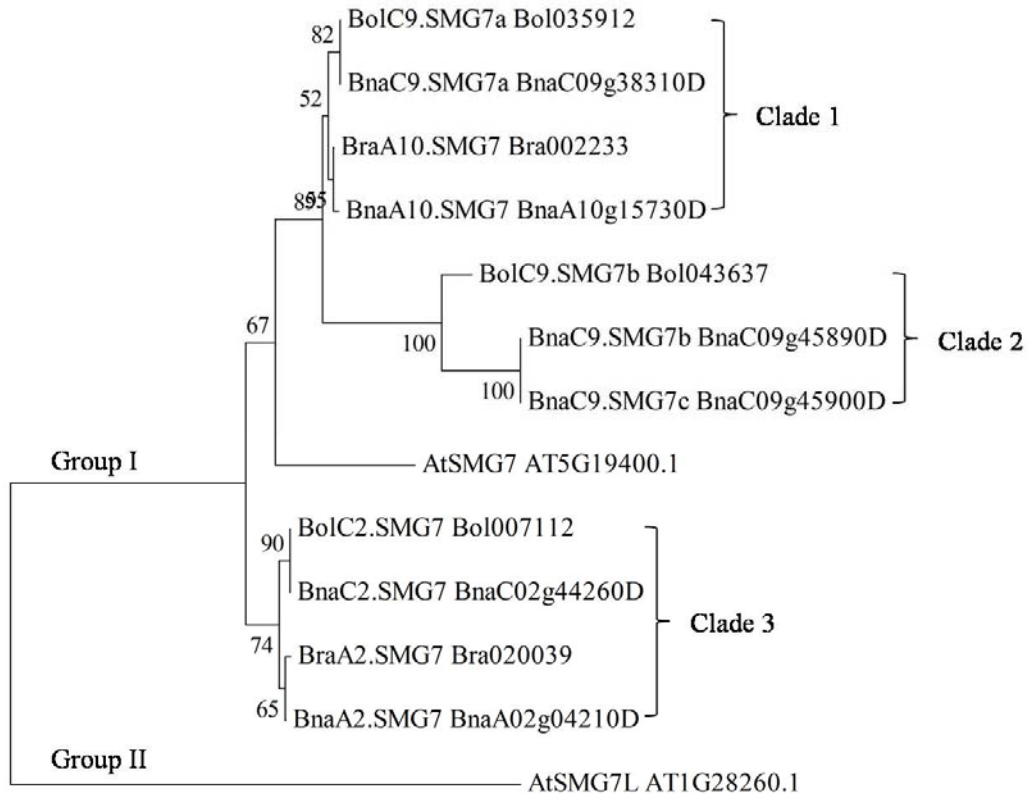

38

0.2

39

**Supplementary Figure S3.** Phylogenetic tree of the *Brassicaceae* SMG7 proteins.

40

The bootstrap neighbor-joining phylogenetic tree was constructed using MEGA 4.0.

41

The lengths of the branches refer to the amino acid variation rates.

42

43

44

45

46

47

48

49

50

51

52

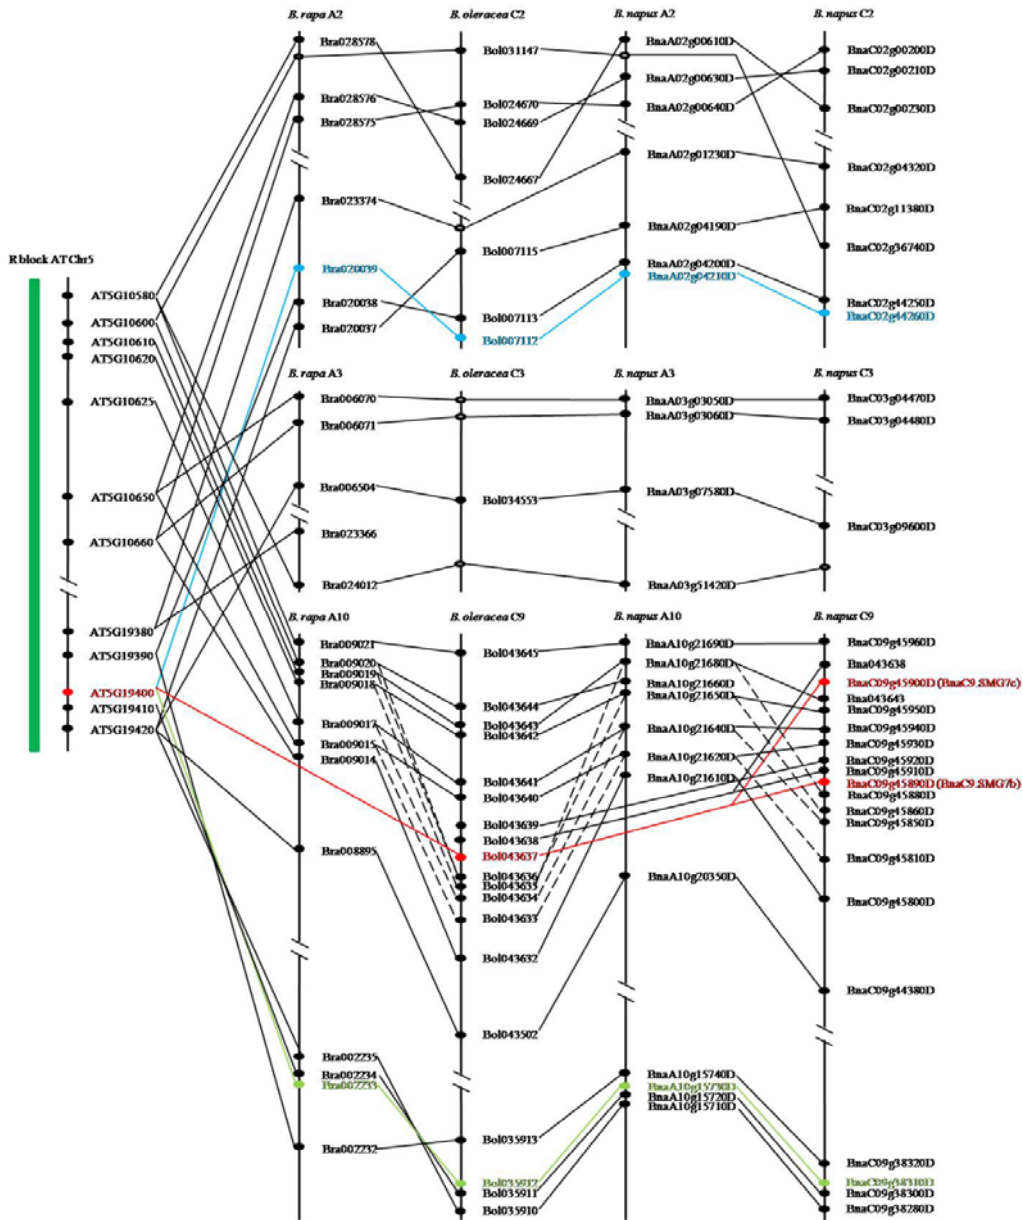

53

54 **Supplementary Figure S4.** Origin and evolution analysis of the *SMG7* homologs.  
 55 Syntenic analysis of the genomic regions spanning *SMG7* and its homologs from the  
 56 *Arabidopsis*, *B. rapa*, *B. oleracea* and *B. napus* genomes. The region including  
 57 *BnaC9.SMG7b* and *BnaC9.SMG7c* and their flanking genes on the C9 chromosome of  
 58 the *B. napus* genome was corrected based on the partial sequences of BAC clone  
 59 HBnB016G24. The green bar represents the ancestral karyotype R block (Schranz et  
 60 al., 2006). The loci individually depicted by blue, red and green ellipses represent the  
 61 *SMG7* homologs in the A or C genomes, which are connected by blue, red and green

---

62 solid lines, respectively. The black filled ellipses represent homologs, which are  
63 connected by solid or dotted lines, whereas the hollow white ellipses represent the  
64 absence of a homologous gene in the expected positions.

65

66

67

68

69

70

71

72

73

74

75

76

77

78

79

80

81

82

83

84

85

86

87

88

89

90

91

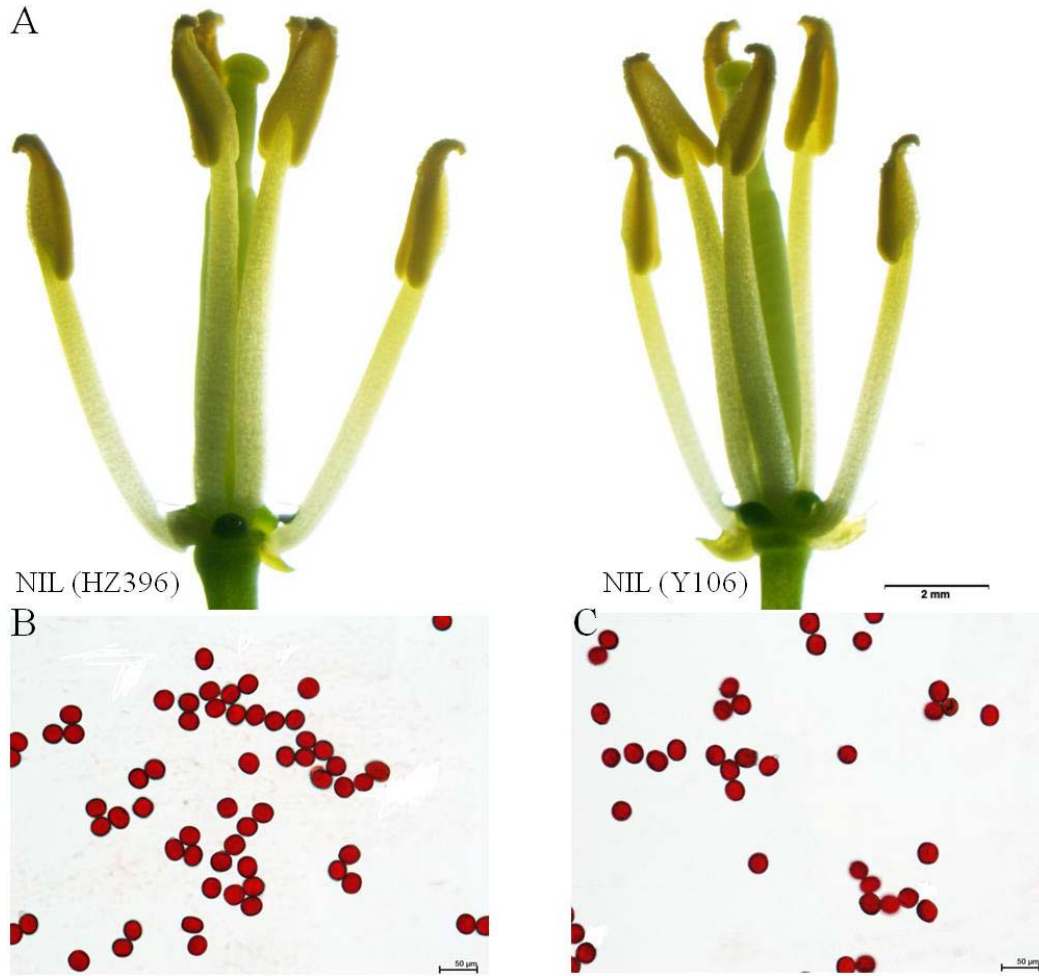

92

93 **Supplementary Figure S5.** Flower phenotype and pollen fertility of NIL(HZ396) and  
94 NIL(Y106). A, Flower morphology of NIL(HZ396) and NIL(Y106) after the removal  
95 of petals. Bar=2 mm. B and C, Carmine acetate staining of NIL(HZ396) and  
96 NIL(Y106) pollen. Bars=50 μm.

97

98

99

100

101

102

103

104

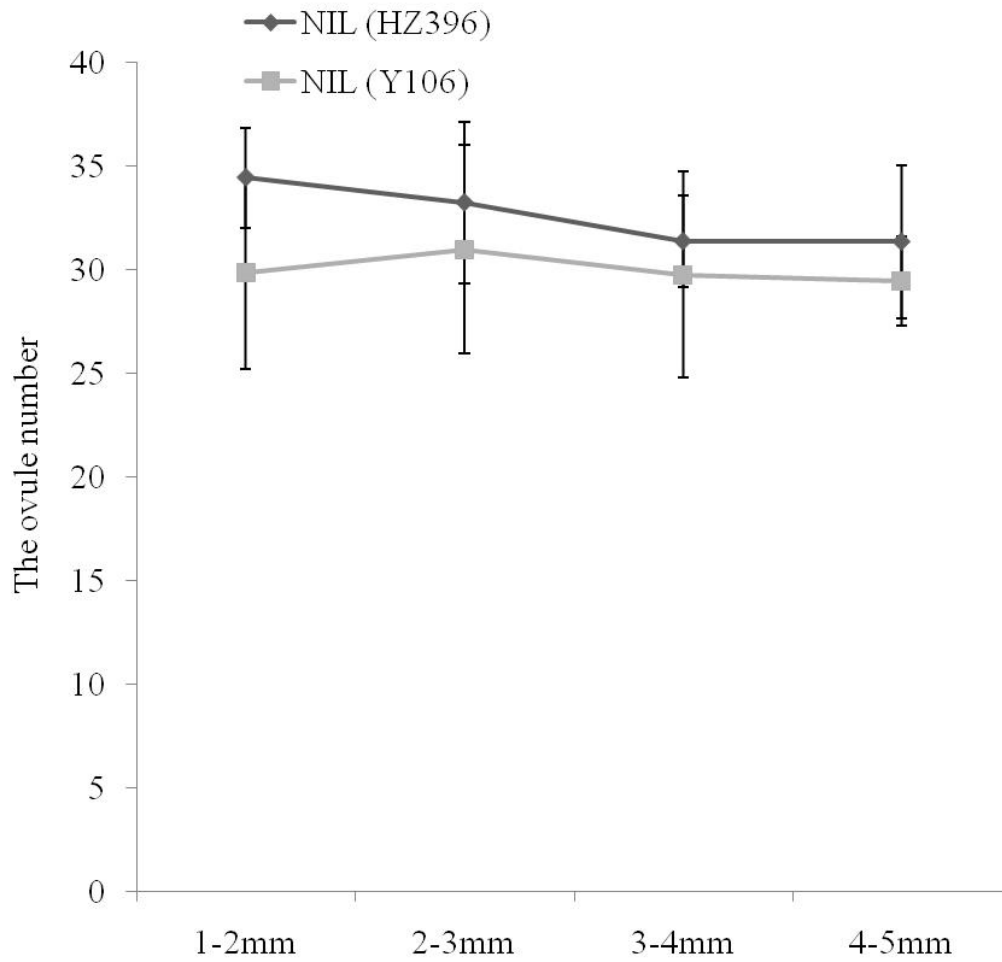

105

106 **Supplementary Figure S6.** Quantitative analysis of ovule number in NIL(HZ396)

107 and NIL(Y106). Ovaries from NIL(HZ396) and NIL(Y106) with sizes of 1-2, 2-3, 3-4

108 and 4-5 mm before pollination. Error bars represent the standard deviations.

109

110

111

112

113

114

115

116



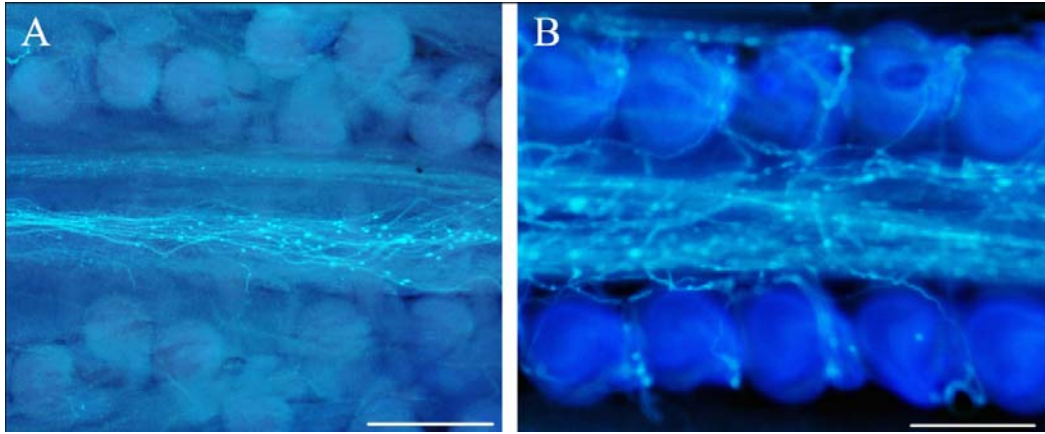

117  
118 **Supplementary Figure S7.** Fluorescence micrographs of pollen tube germination and  
119 growth in NIL(HZ396) and NIL(Y106). A, Pollen grain germination 72 h after  
120 artificial pollination on NIL(HZ396). B, Pollen grain germination 72 h after artificial  
121 pollination on NIL(Y106). Bars=500  $\mu$ m.

122  
123  
124  
125  
126  
127  
128  
129  
130  
131  
132  
133  
134  
135  
136  
137  
138  
139

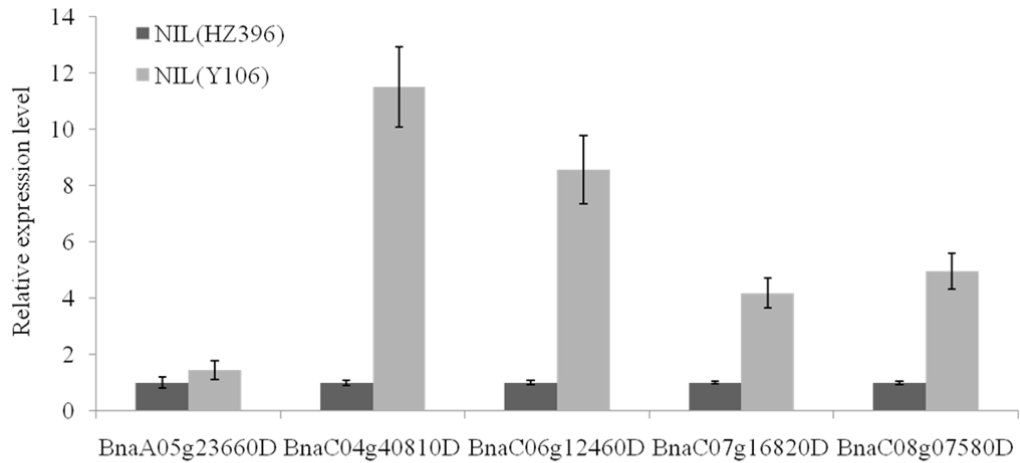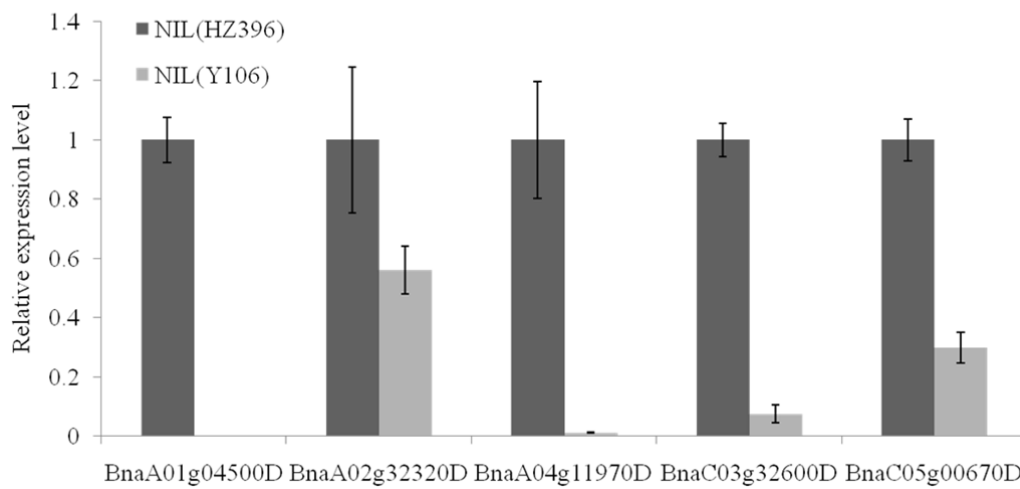

140

141 **Supplementary Figure S8.** qPCR confirmation of the differentially expressed genes  
 142 (DEGs) between NIL(HZ396) and NIL(Y106). Total RNA was extracted from ovaries  
 143 during meiotic stages with length <1 mm before pollination. Error bars represent  
 144 standard errors from three independent RNA samples.

145

146

147

148

149

150

151

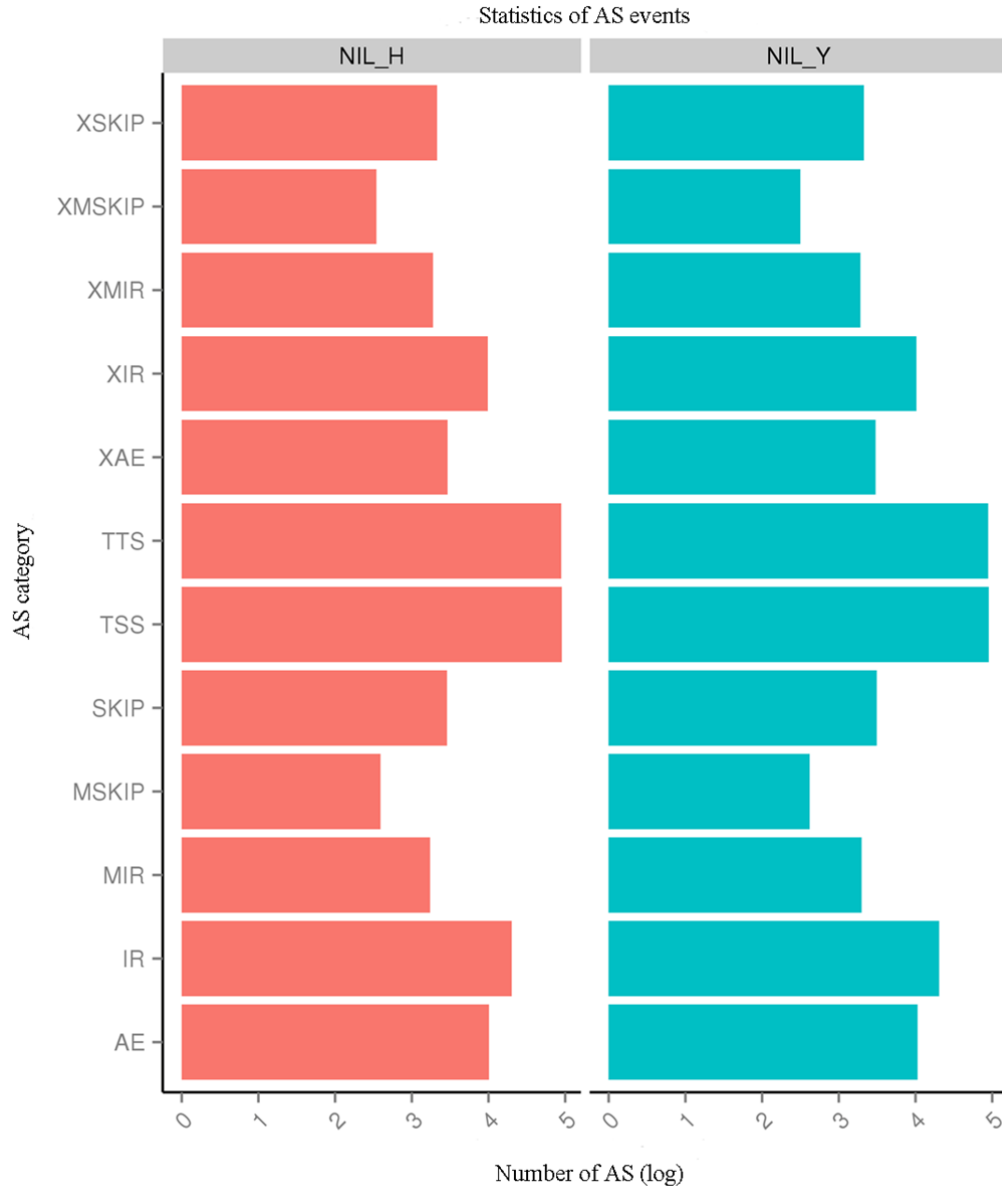

152

153 **Supplementary Figure S9.** Statistics of alternative splicing (AS) events in

154 NIL(HZ396) and NIL(Y106). TSS: Alternative 5' first exon (transcription start site);

155 TTS: Alternative 3' last exon (transcription terminal site); SKIP: Skipped exon

156 (SKIP\_ON, SKIP\_OFF pair); XSKIP: Approximate SKIP (XSKIP\_ON, XSKIP\_OFF

157 pair); MSKIP: Multi-exon SKIP(MSKIP\_ON, MSKIP\_OFF pair); XMSKIP:

158 Approximate MSKIP (XMSKIP\_ON, XMSKIP\_OFF pair); IR: Intron retention

159 (IR\_ON, IR\_OFF pair); XIR: Approximate IR (XIR\_ON, XIR\_OFF pair); MIR:

160 Multi-IR (MIR\_ON, MIR\_OFF pair); XMIR: Approximate MIR (XMIR\_ON,

161 XMIR\_OFF pair); AE: Alternative exon ends (5', 3', or both); XAE: Approximate AE.

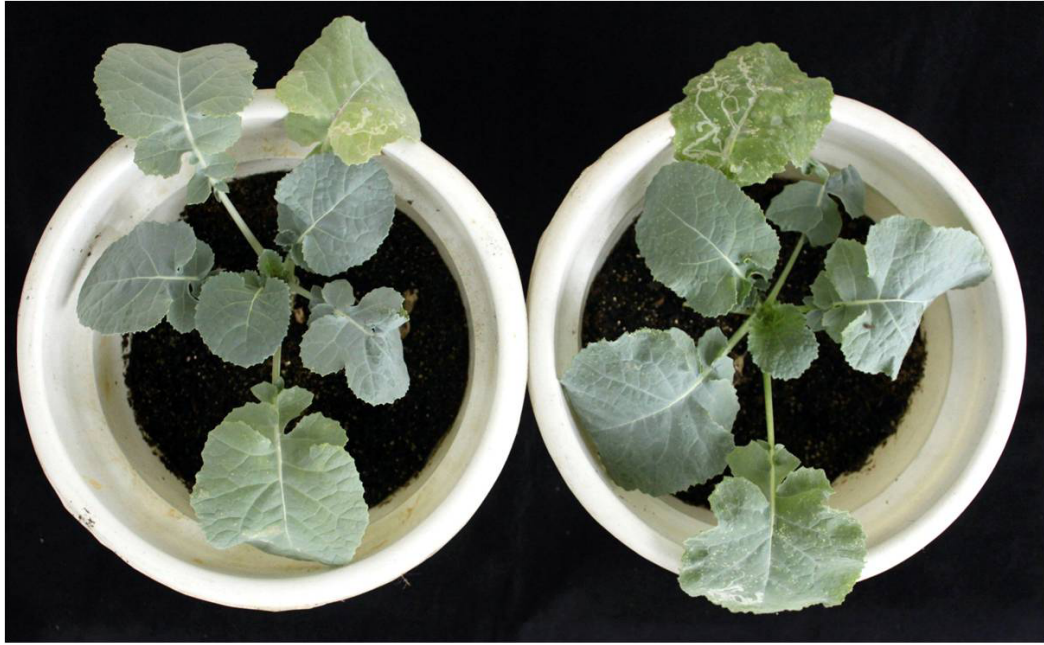

NIL (HZ396)

NIL (Y106)

162

163

**Supplementary Figure S10.** Ten-week-old NIL(HZ396) and NIL(Y106) plants.

164

165

166

167

168

169

170

171

172

173

174

175

176

177

178

179

180

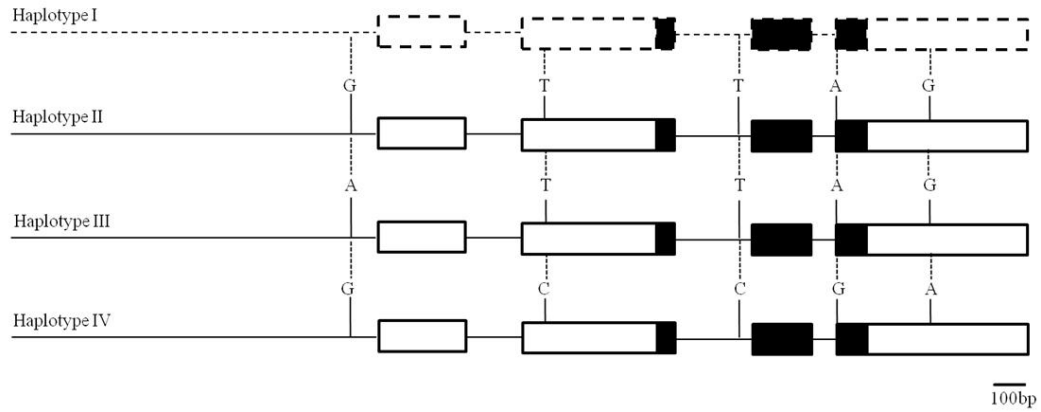

181

182 **Supplementary Figure S11.** Gene structure and natural variations of *BnaC9.SMG7b*.

183 Black lines represent 5' upstream regions and introns. Black bars represent exons and

184 white bars represent 5' and 3' untranslated regions. Bar=100 bp.

185

186

187

188

189

190

191

192

193

194

195

196

197

198

199

200

201

202

203

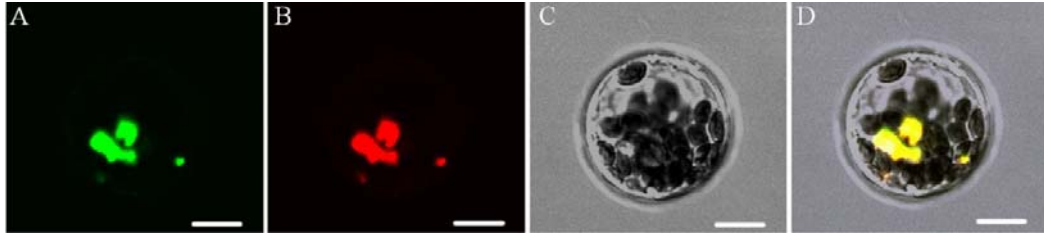

204

205

206

207

208

209

210

211

212

213

214

215

216

217

218

219

220

221

222

223

224

225

226

227

228

229

230

**Supplementary Figure S12.** BnaC9.SMG7c subcellular localization. Co-localization of BnaC9.SMG7c-GFP (A) and AtDCP1-RFP (B) in the P-bodies. The bright-field image (C) and merged images (D) are also shown. Bars=10  $\mu$ m.

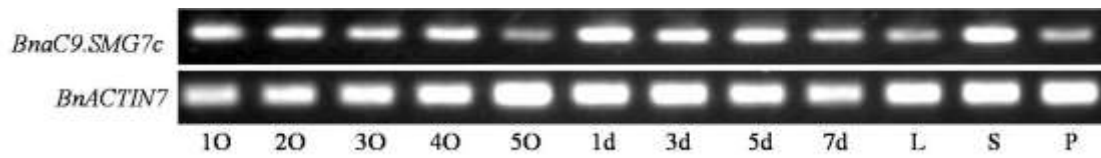

**Supplementary Figure S13.** Expression patterns of *BnaC9.SMG7c* by RT-PCR. 1O-5O, ovary from NIL(Y106) with <1, 1-2, 2-3, 3-4 and 4-5 mm before pollination; 1d-7d, ovary from NIL(Y106) grown for 1, 3, 5 and 7 days after pollination; L, leaves; S, stamens; P, pedicels. *BnACTIN7* expression was used as a control.

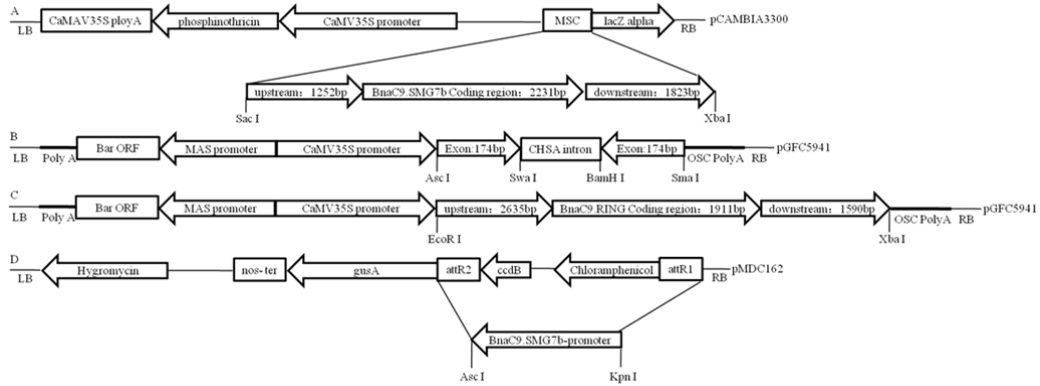

258

259 **Supplementary Figure S14.** Schematic presentation of transgenic constructs. A, The  
 260 genetic complementation construct of *BnaC9.SMG7b*. B, The RNAi construct of  
 261 *BnaC9.SMG7b*. C, The genetic complementation construct of *BnaC9.RING*. D, The  
 262 promoter analysis construct of *BnaC9.SMG7b*.

263

264

265

266

267

268

269

270

271

272

273

274

275

276

277

278

279

280



281 **Supplementary Table S1.** Progeny testing of the seven recombinants occurring in the  
 282 interval between SRC9-298 and SRC9-397 in the autumn of 2012 in Wuhan.

| NO.                                 | Number of seeds per silique of BC <sub>4</sub> F <sub>2</sub> progenies of the recombinants (%) |          |          |          |          |           |          |
|-------------------------------------|-------------------------------------------------------------------------------------------------|----------|----------|----------|----------|-----------|----------|
|                                     | 3U20                                                                                            | 3U82     | 5U19     | 3U42     | 3U92     | 5U73      | T8-15    |
| 1                                   | 28.1                                                                                            | 27       | 26.6     | 10.8     | 10.6     | 13.2      | 16       |
| 2                                   | 25.8                                                                                            | 28.2     | 9.8      | 7        | 12.6     | 12.4      | 9.7      |
| 3                                   | 23.4                                                                                            | 25.7     | 17.9     | 14.5     | 10.7     | 14.9      | 5.7      |
| 4                                   | 30.5                                                                                            | 16.3     | 23.3     | 12.8     | 12       | 10.4      | 15.4     |
| 5                                   | 27.5                                                                                            | 18       | 26.4     | 15.7     | 16.1     | 15.1      | 15.3     |
| 6                                   | 27.4                                                                                            | 27.1     | 26.5     | 16.9     | 8.8      | 18.1      | 16.5     |
| 7                                   | 25.1                                                                                            | 10.9     | 23.9     | 12.6     | 10.2     | 13.7      | 15.7     |
| 8                                   | 9.7                                                                                             | 8.2      | 8        | 13.3     | 12.2     | 18.3      |          |
| 9                                   | 14.1                                                                                            | 7        | 26.9     | 12.1     | 12.8     | 12.4      |          |
| 10                                  | 9.7                                                                                             | 14       | 18.3     | 13.2     | 12.8     | 12.9      |          |
| Mean ± s.e.m                        | 22.1±2.5                                                                                        | 18.3±2.6 | 20.8±2.2 | 12.9±0.9 | 11.9±0.6 | 14.1±0.8  | 13.5±1.6 |
| Range                               | 9.7-30.5                                                                                        | 7-28.2   | 8-26.9   | 7-16.9   | 8.8-16.1 | 10.4-18.3 | 5.7-16.5 |
| <i>qSS.C9</i> genotype <sup>a</sup> | H                                                                                               | H        | H        | B        | B        | B         | B        |

283 <sup>a</sup>*qSS.C9* genotype deduced by progeny testing. B, homozygous for HZ396 genotype;  
 284 H, heterozygote.

285  
 286  
 287  
 288  
 289  
 290  
 291  
 292  
 293

294 **Supplementary Table S2.** Number of seeds per silique in five T<sub>1</sub>  
 295 *BnaC9.SMG7b*-transgenic rapeseed lines.

| NO.          | SS05      | SS06      | SS13      | SS40      | SS47      |
|--------------|-----------|-----------|-----------|-----------|-----------|
| 1            | 20.2      | 19.5      | 21.5      | 21.2      | 22.6      |
| 2            | 20.1      | 22.9      | 20.3      | 19.4      | 21.5      |
| 3            | 21.9      | 18.7      | 19.2      | 18.3      | 22.7      |
| 4            | 17.0      | 24.4      | 21.7      | 18.2      | 17.0      |
| 5            | 22.9      | 25.3      | 22.1      | 21.2      | 22.3      |
| 6            | 19.4      | 19.7      | 21.8      | 18.3      | 18.7      |
| 7            | 19.3      | 21.1      | 20.6      | 20.1      | 21.3      |
| 8            | 19.6      | 21.8      | 18.4      | 17.0      | 19.7      |
| 9            | 20.7      | 23.7      | 19.6      | 24.0      | 22.7      |
| 10           | 19.3      | 21.9      | 19.3      | 20.0      | 20.8      |
| Mean ± s.e.m | 20.0±0.5  | 21.9±0.7  | 20.5±0.4  | 19.8±0.6  | 20.9±0.6  |
| Range        | 17.0-22.9 | 18.7-25.3 | 18.4-22.1 | 17.0-24.0 | 17.0-22.7 |

296  
 297  
 298  
 299  
 300  
 301  
 302  
 303  
 304  
 305  
 306  
 307  
 308  
 309

310 **Supplementary Table S3.** Number of seeds per silique and *BnaC9.SMG7b*  
 311 expression level in Ri2-8 and Ri2-14 T<sub>1</sub> families of 7-5 RNAi-transformed plants.

| Plant                        | Number of seeds per silique | Relative expression level | Correlation coefficient |
|------------------------------|-----------------------------|---------------------------|-------------------------|
| Ri2-8 T <sub>1</sub> family  |                             |                           | 0.714 <sup>a</sup>      |
| Ri2-8-1                      | 5.6±0.8                     | 0.64±0.03                 |                         |
| Ri2-8-2                      | 4.2±1.0                     | 0.73±0.03                 |                         |
| Ri2-8-3                      | 9.7±0.9                     | 0.68±0.06                 |                         |
| Ri2-8-4                      | 7.6±1.6                     | 0.82±0.07                 |                         |
| Ri2-8-5                      | 22.8±1.0                    | 1.03±0.02                 |                         |
| Ri2-8-6                      | 21.3±1.1                    | 0.70±0.02                 |                         |
| Ri2-8-7                      | 13.1±1.5                    | 0.81±0.08                 |                         |
| Ri2-8-9                      | 28.3±1.0                    | 1.20±0.09                 |                         |
| Ri2-8-10                     | 8.1±1.1                     | 0.94±0.10                 |                         |
| Ri2-8-11                     | 9.7±0.9                     | 0.87±0.03                 |                         |
| Ri2-8-12                     | 11.4±1.1                    | 0.86±0.09                 |                         |
| Ri2-8-13                     | 20.0±1.4                    | 1.21±0.13                 |                         |
| Ri2-8-14                     | 32.8±1.7                    | 1.61±0.11                 |                         |
| Ri2-8-15                     | 31.1±0.9                    | 0.91±0.02                 |                         |
| Ri2-14 T <sub>1</sub> family |                             |                           | 0.761 <sup>b</sup>      |
| Ri2-14-1                     | 10.7±1.1                    | 1.01±0.08                 |                         |
| Ri2-14-2                     | 25.5±1.5                    | 1.17±0.07                 |                         |
| Ri2-14-3                     | 25.7±1.4                    | 1.14±0.09                 |                         |
| Ri2-14-4                     | 7.5±0.6                     | 0.86±0.04                 |                         |
| Ri2-14-5                     | 27.6±1.6                    | 1.53±0.05                 |                         |
| Ri2-14-6                     | 20.5±0.7                    | 1.29±0.03                 |                         |
| Ri2-14-7                     | 11.1±0.8                    | 1.15±0.007                |                         |

---

312 Number of seeds per silique and expression are given as mean  $\pm$  s.e.m. Relative  
313 expression level of the *BnaC9.SMG7b* gene in each progeny was determined by qPCR  
314 with the RNA isolated from flower buds. <sup>a</sup> indicates  $P < 0.01$  for the correlation  
315 coefficient of the Ri2-8 T<sub>1</sub> family, and <sup>b</sup> indicates  $P < 0.05$  for the correlation  
316 coefficient of the Ri2-14 T<sub>1</sub> family.

317

318

319

320

321

322

323

324

325

326

327

328

329

330

331

332

333

334

335

336

337

338

339

340

341

---

342 **Supplementary Table S4.** Confocal laser scanning microscopy observations of  
343 NIL(Y106) and NIL(HZ396) ovules.

| Ovule genotype | Normal FG <sup>a</sup> (%) | Abnormal FG <sup>b</sup> (%) |
|----------------|----------------------------|------------------------------|
| NIL(Y106)      | 55 (96.5%)                 | 2 (3.5%)                     |
| NIL(HZ396)     | 44 (34.4%)                 | 84 (65.6%)                   |

344 <sup>a</sup> normal female gametophyte at stage FG5. <sup>b</sup> ovule with no female gametophyte.

345

346

347

348

349

350

351

352

353

354

355

356

357

358

359

360

361

362

363

364

365

366

367

368 **Supplementary Table S5.** Quantitative analysis of initial ovule number and number  
369 of seeds per silique in NIL(Y106) and NIL(HZ396).

---

| Ovule genotype | NO of ovule initiation | Number of seeds<br>per silique | Proportion of abortion ovule<br>numbers (%) |
|----------------|------------------------|--------------------------------|---------------------------------------------|
| NIL(Y106)      | 34.3±0.3               | 27.6±0.7                       | 19.5%                                       |
| NIL(HZ396)     | 34.4±0.3               | 10.4±0.5                       | 69.8%                                       |

---

370 Data are given as mean ± s.e.m.

371

372

373

374

375

376

377

378

379

380

381

382

383

384

385

386

387

388

389

390

391

392

393 **Supplementary Table S6.** Meiosis during megasporogenesis in NIL(Y106) and  
 394 NIL(HZ396).

|            | Dyad (%)       | Triad (%)       | Tetrad1 (%)     | Total |
|------------|----------------|-----------------|-----------------|-------|
| NIL(Y106)  | 41<br>(9.45%)  | 157<br>(36.17%) | 236<br>(54.38%) | 434   |
| NIL(HZ396) | 45<br>(11.28%) | 140<br>(35.09%) | 214<br>(53.63%) | 399   |

395  
 396  
 397  
 398  
 399  
 400  
 401  
 402  
 403  
 404  
 405  
 406  
 407  
 408  
 409  
 410  
 411  
 412  
 413  
 414

---

415 **Supplementary Table S7.** Part of DEGs expression quantification in NIL(HZ396)  
416 and NIL(Y106) by RNA-seq.

| Gene ID       | NIL(HZ396) | NIL(Y106)  |
|---------------|------------|------------|
| BnaA05g23660D | 45.2679449 | 92.3895353 |
| BnaC04g40810D | 12.3068881 | 55.0821331 |
| BnaC06g12460D | 10.7016418 | 45.5111242 |
| BnaC07g16820D | 24.1322023 | 77.0075567 |
| BnaC08g07580D | 19.7445292 | 70.3664484 |
| BnaA01g04500D | 129.222325 | 0          |
| BnaA02g32320D | 61.7484733 | 17.7258992 |
| BnaA04g11970D | 358.612017 | 4.59017776 |
| BnaC03g32600D | 125.958324 | 59.5746475 |
| BnaC05g00670D | 670.778909 | 265.302508 |

417  
418  
419  
420  
421  
422  
423  
424  
425  
426  
427  
428  
429  
430  
431  
432  
433  
434  
435  
436



437 **Supplementary Table S8.** Meiotic genes expression quantification in NIL(HZ396)  
 438 and NIL(Y106) by RNA-seq.

| Gene family                  | Gene ID       | NIL(HZ396)  | NIL(Y106)   |
|------------------------------|---------------|-------------|-------------|
| Entry into meiosis           |               |             |             |
| BnAGO9                       | BnaA02g05290D | 49.3659622  | 82.33667686 |
|                              | BnaA10g14440D | 1.107458467 | 0.851700717 |
|                              | BnaC09g36780D | 1.975006991 | 3.13598695  |
|                              | BnaC09g36860D | 0           | 0.018798532 |
| BnCDC45                      | BnaA03g37670D | 3.091703106 | 3.52102192  |
|                              | BnaA07g05080D | 1.682906433 | 3.194329164 |
|                              | BnaC03g74180D | 3.627816788 | 5.234455858 |
| BnMEI1 <sup>a</sup>          | BnaA07g33480D | 4.0961519   | 7.17287678  |
|                              | BnaC06g38030D | 3.52774858  | 7.36563184  |
| BnSW11                       | BnaA02g11280D | 3.079670849 | 2.509166783 |
|                              | BnaA10g08080D | 0.75887258  | 0.651617693 |
|                              | BnaC02g15840D | 0.861586509 | 1.798917603 |
|                              | BnaC09g27720D | 7.237326679 | 11.9246432  |
| BnXRI1                       | BnaA06g30010D | 5.505114064 | 7.782530417 |
|                              | BnaA09g03120D | 5.636378723 | 7.72051318  |
|                              | BnaC07g26700D | 9.471440535 | 12.6285537  |
|                              | BnaC09g02540D | 5.363663216 | 8.908185457 |
| Recombination: DSB formation |               |             |             |
| BnDFO                        | BnaA10g04520D | 1.036968744 | 2.821191476 |
|                              | BnaC05g04880D | 6.463771835 | 6.014167875 |
| BnH2AX                       | BnaA06g05170D | 86.3502485  | 95.88013536 |
|                              | BnaA08g26730D | 31.31113827 | 34.24290548 |
|                              | BnaA09g48670D | 0           | 0.116077646 |
|                              | BnaC05g06450D | 108.6105109 | 109.4612199 |
| BnPHS1                       | BnaA03g14800D | 5.546848144 | 7.302996885 |
|                              | BnaC03g17840D | 6.979530211 | 8.168643913 |
| BnPRD1                       | BnaA03g24590D | 0.72057029  | 1.703428582 |
|                              | BnaC03g29300D | 1.269872751 | 2.074887917 |
| BnPRD2                       | BnaA02g08030D | 0.24091193  | 0.274365344 |
|                              | BnaA10g11740D | 2.044874847 | 2.105856393 |
|                              | BnaC02g11140D | 0.803604066 | 0.717799063 |
|                              | BnaC09g33470D | 2.267960796 | 2.663152843 |
| BnPRD3 <sup>a</sup>          | BnaA06g35310D | 3.70060041  | 8.53985049  |
|                              | BnaA10g00300D | 5.58474404  | 8.01194344  |
|                              | BnaC05g00390D | 3.06078607  | 3.90078928  |
|                              | BnaC07g20440D | 4.69827208  | 10.5664721  |
| BnSPO11-1                    | BnaA01g29970D | 3.131855094 | 5.761672232 |
|                              | BnaC01g37870D | 1.011830107 | 2.149195198 |
| BnSPO11-2                    | BnaA09g11340D | 0.688590793 | 0.697075206 |

|                                   |               |             |             |
|-----------------------------------|---------------|-------------|-------------|
|                                   | BnaC09g11780D | 0.413154476 | 0.653508005 |
| Recombination: early DSB repair   |               |             |             |
| BnATM                             | BnaA06g20800D | 2.137878903 | 2.502912598 |
|                                   | BnaC03g53260D | 6.100832774 | 6.88895593  |
| BnATR                             | BnaA04g12720D | 23.89073168 | 18.7755024  |
|                                   | BnaC04g33820D | 1.238362521 | 1.977738616 |
| BnBRCA2(IV), BnBRCA2(V)           | BnaA03g00230D | 0.150777639 | 0.243262721 |
|                                   | BnaA05g13130D | 2.007571487 | 2.88680058  |
|                                   | BnaC03g00130D | 2.131026921 | 3.0561526   |
|                                   | BnaC06g42060D | 2.32872433  | 3.448350079 |
| BnCOM1 <sup>a</sup>               | BnaA04g05720D | 1.83289904  | 3.59696378  |
|                                   | BnaC04g28430D | 2.87435946  | 6.66537638  |
| BnMCM8 <sup>a</sup>               | BnaA05g28830D | 1.46115188  | 2.77341627  |
|                                   | BnaC05g43310D | 0.78509653  | 1.65577091  |
| BnMRE11                           | BnaA10g07340D | 2.770725725 | 4.190862724 |
|                                   | BnaC09g30690D | 14.03283981 | 14.95849429 |
| BnNBS1                            | BnaA05g33420D | 7.290310223 | 7.911722151 |
| BnRAD50                           | BnaA03g14800D | 5.546848144 | 7.302996885 |
|                                   | BnaC03g17840D | 6.979530211 | 8.168643913 |
| BnRAD51                           | BnaA03g08120D | 3.013697058 | 6.946086319 |
|                                   | BnaA10g14690D | 5.575003207 | 6.950874522 |
|                                   | BnaC03g10300D | 18.2919285  | 21.54479516 |
|                                   | BnaC09g37020D | 4.864463583 | 8.24767947  |
| BnRAD51B                          | BnaA04g17220D | 0.044846682 | 0.085123607 |
|                                   | BnaC04g39830D | 4.068374037 | 4.943645994 |
| BnRAD51C                          | BnaA05g04710D | 4.016269558 | 6.270772372 |
|                                   | BnaC04g04170D | 1.055443474 | 1.335560039 |
| BnRAD51D                          | BnaA08g29130D | 0.699608246 | 1.021483282 |
| BnRPA1A                           | BnaA07g04290D | 3.757769408 | 3.540093129 |
|                                   | BnaC07g47810D | 5.375174817 | 5.735677427 |
| BnRPA1C                           | BnaA02g23910D | 58.5871356  | 64.66933901 |
|                                   | BnaA09g17670D | 2.281331236 | 3.748184624 |
|                                   | BnaC02g31570D | 56.91812798 | 49.2756239  |
|                                   | BnaC09g18720D | 2.69640678  | 3.412037908 |
| BnXRCC3                           | BnaA03g10270D | 0.455770844 | 0.432549924 |
|                                   | BnaC03g12950D | 0.075715178 | 0.646718312 |
| Recombination: IH bias            |               |             |             |
| BnAHP2                            | BnaC05g08840D | 0.213816701 | 0.243507628 |
| BnMND1                            | BnaA03g49390D | 2.506929547 | 3.541142045 |
| BnXRCC2                           | BnaA09g06860D | 4.704967734 | 6.358136073 |
|                                   | BnaC09g06360D | 3.788679668 | 4.432994956 |
| Recombination: CO and NCO outcome |               |             |             |
| BnARP6                            | BnaA08g00100D | 18.5526953  | 21.91236772 |
|                                   | BnaC03g71020D | 17.73679515 | 17.76923147 |

|                                           |               |             |             |
|-------------------------------------------|---------------|-------------|-------------|
| BnBLAP75                                  | BnaA09g06650D | 1.056810039 | 2.031008112 |
|                                           | BnaC09g05950D | 2.381419898 | 3.490583001 |
| BnCDKG1                                   | BnaC02g42490D | 24.00616529 | 36.77840543 |
| BnFANCM                                   | BnaA05g18180D | 2.793890072 | 4.354569966 |
|                                           | BnaC05g27760D | 3.098265088 | 4.810352395 |
| BnHEI10 <sup>a</sup>                      | BnaA05g14420D | 2.93421221  | 4.53199203  |
|                                           | BnaA06g00910D | 1.76557286  | 4.55558987  |
|                                           | BnaC03g69660D | 3.1539716   | 6.20425502  |
| BnMER3 <sup>a</sup>                       | BnaC06g06360D | 3.23699338  | 6.63964133  |
|                                           | BnaA02g29040D | 2.05494471  | 4.94160585  |
|                                           | BnaC02g37070D | 1.32408251  | 3.55068848  |
| BnMHF1                                    | BnaA03g13400D | 8.870033114 | 9.722331954 |
|                                           | BnaC03g16220D | 7.549729269 | 12.65830902 |
| BnMHF2                                    | BnaA07g34380D | 3.831188012 | 3.952167461 |
|                                           | BnaC03g70530D | 1.525308675 | 1.061570562 |
|                                           | BnaC06g39210D | 10.32755029 | 12.01458908 |
| BnMHL1                                    | BnaA03g23940D | 2.509805365 | 3.479856865 |
|                                           | BnaC03g28480D | 4.343362273 | 5.518259988 |
| BnMHL3                                    | BnaA03g53380D | 2.114033612 | 4.142558833 |
|                                           | BnaC07g45660D | 4.49209934  | 7.343762371 |
| BnMSH2                                    | BnaA03g34810D | 2.591832253 | 4.15862397  |
| BnMSH4 <sup>a</sup>                       | BnaA08g08260D | 1.49979069  | 3.55844586  |
| BnMSH5 <sup>a</sup>                       | BnaA05g20450D | 2.34023885  | 6.4681952   |
| BnMUS81                                   | BnaA09g20790D | 9.021846838 | 10.76840565 |
| BnPTD                                     | BnaA06g38110D | 3.693151097 | 5.885737836 |
|                                           | BnaC05g49280D | 11.66013743 | 11.01182346 |
| BnRFC1                                    | BnaA02g05420D | 29.60298865 | 37.80334093 |
|                                           | BnaC08g49560D | 0.094849274 | 0.108020195 |
|                                           | BnaA01g30730D | 5.061142328 | 6.633106254 |
| BnRBR                                     | BnaA03g32200D | 6.774862458 | 5.133912396 |
|                                           | BnaA05g26760D | 13.19074544 | 16.37060044 |
|                                           | BnaC03g37490D | 2.019907424 | 2.362808801 |
|                                           | BnaC05g40780D | 12.02666434 | 13.68040049 |
|                                           | BnaA03g12670D | 0.45169902  | 1.47547585  |
| BnSHOC1 <sup>a</sup>                      | BnaC03g15550D | 0.60418818  | 1.4829455   |
|                                           | BnaA06g30240D | 12.95961057 | 15.86580961 |
| BnZIP4                                    | BnaC07g26460D | 17.11186423 | 19.13308265 |
|                                           |               |             |             |
| Recombination: control of CO distribution |               |             |             |
| BnAXR1                                    | BnaA08g28200D | 4.45631689  | 4.261072504 |
|                                           | BnaA09g50410D | 6.495395704 | 8.476137874 |
|                                           | BnaA10g03210D | 5.140251423 | 6.145469556 |
|                                           | BnaC05g03220D | 13.55157193 | 14.63508729 |
|                                           | BnaC08g44060D | 1.818108746 | 2.622727346 |
|                                           | BnaC08g46380D | 6.366166986 | 7.091187824 |

|                                         |               |             |             |
|-----------------------------------------|---------------|-------------|-------------|
| BnPSS1                                  | BnaA06g38300D | 2.703404228 | 2.52679559  |
|                                         | BnaC05g11410D | 3.031089589 | 3.420892491 |
|                                         | BnaC08g39040D | 0.560031231 | 1.022112274 |
| Axis-SC                                 |               |             |             |
| BnASY1 <sup>a</sup>                     | BnaA07g26350D | 8.08536014  | 25.4448534  |
|                                         | BnaC06g26770D | 0.89366017  | 1.84771041  |
|                                         | BnaC06g28450D | 2.78705724  | 8.77188388  |
| BnASY3                                  | BnaC04g00500D | 12.27461768 | 17.13249355 |
| BnZYP1 <sup>a</sup>                     | BnaA07g20670D | 1.49916053  | 5.10741641  |
|                                         | BnaA07g34050D | 2.06771417  | 17.5352784  |
|                                         | BnaC06g20530D | 4.79538075  | 10.8205759  |
|                                         | BnaC06g38690D | 6.30460919  | 13.5752357  |
| Sister chromatid cohesion               |               |             |             |
| BnCTF7                                  | BnaA03g51450D | 8.095466842 | 10.67085214 |
|                                         | BnaA08g12500D | 0.402073704 | 1.001670029 |
|                                         | BnaC03g67630D | 1.943356238 | 4.06840768  |
|                                         | BnaC07g50930D | 4.710829161 | 8.228208817 |
| BnSCC2                                  | BnaA02g02660D | 6.783273864 | 10.19749368 |
|                                         | BnaA10g18670D | 4.858390595 | 7.729974593 |
|                                         | BnaC02g06100D | 0.880665496 | 1.1323698   |
| BnSCC3                                  | BnaA05g00110D | 44.54816308 | 61.42347134 |
|                                         | BnaC04g51720D | 0.174031902 | 0.247747811 |
| BnSMC2                                  | BnaA06g17360D | 2.528346126 | 4.742600953 |
|                                         | BnaA06g21840D | 5.696215095 | 7.7490712   |
|                                         | BnaC03g74950D | 10.84214309 | 12.47755727 |
| BnSMC3                                  | BnaA03g22510D | 0.256162498 | 0           |
|                                         | BnaC03g72770D | 0.560031231 | 0.027256327 |
|                                         | BnaC04g38670D | 21.4314635  | 26.31630096 |
| BnSGO1, BnSGO2                          | BnaA07g09410D | 2.745099618 | 2.158627788 |
|                                         | BnaC07g12350D | 9.176475867 | 10.7187035  |
| BnSYN1 <sup>a</sup>                     | BnaA10g24970D | 2.44111773  | 5.57546569  |
|                                         | BnaC09g49900D | 1.49873232  | 2.84474779  |
| BnSYN3                                  | BnaA09g37900D | 2.333775632 | 2.115328011 |
|                                         | BnaC04g23000D | 2.125246723 | 0.844946147 |
|                                         | BnaC08g29760D | 3.972623041 | 7.363321754 |
| BnPANS1                                 | BnaA03g01210D | 2.735093964 | 2.868980824 |
|                                         | BnaA10g25920D | 5.714884985 | 8.249098467 |
| BnTTN8                                  | BnaA03g37440D | 0.376133465 | 0.164755368 |
|                                         | BnaA09g34490D | 23.6982843  | 31.97017658 |
|                                         | BnaC03g43960D | 1.807321301 | 1.480086714 |
|                                         | BnaC08g25430D | 23.94544432 | 29.04498132 |
| Cell cycle control: spindle–cytokinesis |               |             |             |
| BnATK1                                  | BnaA09g19860D | 21.56025411 | 28.91793474 |
|                                         | BnaC09g21860D | 21.0367089  | 27.61639233 |

|                        |               |             |             |
|------------------------|---------------|-------------|-------------|
| BnCDKA;1               | BnaA01g20470D | 13.41102068 | 15.22026408 |
|                        | BnaC01g25750D | 18.7945605  | 24.13903502 |
|                        | BnaC03g52880D | 6.02603741  | 7.671854483 |
|                        | BnaC08g20460D | 0.120622111 | 0           |
| BnCYCB3;1 <sup>a</sup> | BnaA06g10930D | 4.50157765  | 7.12945094  |
|                        | BnaA08g23620D | 2.30134291  | 3.16051039  |
|                        | BnaC05g12450D | 8.81984754  | 13.506279   |
|                        | BnaC08g16920D | 4.93245143  | 7.16089366  |
| BnJASON <sup>a</sup>   | BnaA08g28700D | 9.99975383  | 19.4426328  |
|                        | BnaC08g01870D | 7.09961856  | 11.47549    |
| BnMMD1 <sup>a</sup>    | BnaA02g12370D | 15.4538664  | 32.1657266  |
| BnMPK4                 | BnaA03g26950D | 16.64843151 | 19.52835687 |
|                        | BnaC03g31910D | 48.58910209 | 49.39786635 |
| BnNACK2                | BnaA06g19570D | 5.906780144 | 8.681767863 |
| BnOSD1 <sup>a</sup>    | BnaA09g37090D | 9.72455461  | 18.5245993  |
|                        | BnaC08g28850D | 13.5334054  | 21.7693159  |
| BnPS1 <sup>a</sup>     | BnaA07g05890D | 16.1150548  | 23.2469015  |
|                        | BnaA08g06420D | 1.43926562  | 1.81135117  |
|                        | BnaA10g09600D | 6.18313873  | 12.791739   |
|                        | BnaC07g48210D | 5.22695816  | 9.34892027  |
|                        | BnaC08g06940D | 1.36828143  | 1.43971815  |
|                        | BnaC09g31940D | 4.93826406  | 8.22242932  |
| BnSDS <sup>a</sup>     | BnaA06g09550D | 0.46551879  | 2.33523507  |
|                        | BnaA08g31410D | 0.7519154   | 2.66826708  |
|                        | BnaA09g45480D | 1.36423608  | 4.4817579   |
|                        | BnaC05g10920D | 0.39681096  | 2.20162627  |
|                        | BnaC08g16420D | 0.45940504  | 3.14542108  |
|                        | BnaC08g39330D | 0.3840165   | 2.55115959  |
| BnSKP1 <sup>a</sup>    | BnaA02g17620D | 181.85469   | 191.766039  |
|                        | BnaA07g21520D | 188.134783  | 231.623014  |
|                        | BnaA07g32230D | 104.293451  | 117.013432  |
|                        | BnaC02g23320D | 52.9051577  | 56.0864113  |
|                        | BnaC05g15660D | 66.3980048  | 0           |
|                        | BnaC06g22030D | 366.258725  | 402.528256  |
| BnSMG7                 | BnaC06g36600D | 115.197839  | 131.153409  |
|                        | BnaA02g04210D | 13.55235271 | 14.5444385  |
|                        | BnaA10g15730D | 14.29953816 | 15.52103359 |
|                        | BnaC02g44260D | 0.77926661  | 0.805303033 |
|                        | BnaC09g38310D | 15.78776183 | 15.92843249 |
|                        | BnaC09g45890D | 0           | 0.613145116 |
| BnTAM <sup>a</sup>     | BnaC09g45900D | 0.522654983 | 0.595111436 |
|                        | BnaA02g03470D | 12.4044015  | 12.0471034  |
|                        | BnaA07g33530D | 2.98282585  | 3.34555571  |
|                        | BnaC02g07160D | 0.52877367  | 1.04226928  |

---

---

|                     |               |            |            |
|---------------------|---------------|------------|------------|
|                     | BnaC06g38120D | 7.48268662 | 18.1239553 |
| BnTDM1 <sup>a</sup> | BnaA03g44650D | 3.02250106 | 5.96649797 |
|                     | BnaC07g36490D | 4.59420161 | 7.34338212 |

---

439 <sup>a</sup> indicates that these gene families are analyzed by qPCR.

440

441

442

443

444

445

446

447

448

449

450

451

452

453

454

455

456

457

458

459

460

461

462

463

464

465

466 **Supplementary Table S9.** *qSS.C9* genotypes, haplotypes and number of seeds per  
 467 silique in 84 accessions.

| Accessions | SNP1            | SNP2 | SNP3          | SNP4 | SNP5 | Number of seeds<br>per silique | <i>qSS.C9</i><br>haplotype <sup>a</sup> | Geographical/Collection<br>region |
|------------|-----------------|------|---------------|------|------|--------------------------------|-----------------------------------------|-----------------------------------|
|            | promoter region |      | coding region |      |      |                                |                                         |                                   |
|            |                 |      |               |      |      |                                |                                         |                                   |
| g187       | —               | —    | —             | —    | —    | 12.3±1.3                       | Type I                                  | China                             |
| HZ396      | —               | —    | —             | —    | —    | 9.6±1.7                        | Type I                                  | Hubei, China                      |
| g035       | —               | —    | —             | —    | —    | 13.5±0.4                       | Type I                                  | Hubei, China                      |
| g080       | —               | —    | —             | —    | —    | 18.2±0.7                       | Type I                                  | Hubei, China                      |
| g048       | —               | —    | —             | —    | —    | 14.4±0.6                       | Type I                                  | Sichuan, China                    |
| g099       | —               | —    | —             | —    | —    | 16.3±1.2                       | Type I                                  | Europe                            |
| g163       | —               | —    | —             | —    | —    | 11.6±1.6                       | Type I                                  | Europe                            |
| g169       | —               | —    | —             | —    | —    | 14.7±0.2                       | Type I                                  | Europe                            |
| g028       | G               | T    | T             | A    | G    | 18.1±1.9                       | Type II                                 | Australia                         |
| g037       | G               | T    | T             | A    | G    | 19.5±1.0                       | Type II                                 | Australia                         |
| g039       | G               | T    | T             | A    | G    | 23.1±1.0                       | Type II                                 | Australia                         |
| g133       | G               | T    | T             | A    | G    | 15.2±0.1                       | Type II                                 | Canada                            |
| g027       | G               | T    | T             | A    | G    | 20.8±3.4                       | Type II                                 | Canada                            |
| g183       | G               | T    | T             | A    | G    | 15.0±1.9                       | Type II                                 | China                             |
| g184       | G               | T    | T             | A    | G    | 17.6±3.0                       | Type II                                 | China                             |
| g109       | G               | T    | T             | A    | G    | 23.8±1.2                       | Type II                                 | China                             |
| g086       | G               | T    | T             | A    | G    | 10.6±1.0                       | Type II                                 | Hubei, China                      |
| g076       | G               | T    | T             | A    | G    | 14.5±1.2                       | Type II                                 | Hubei, China                      |
| g003       | G               | T    | T             | A    | G    | 14.6±0.9                       | Type II                                 | Hubei, China                      |
| g085       | G               | T    | T             | A    | G    | 14.7±4.4                       | Type II                                 | Hubei, China                      |
| g171       | G               | T    | T             | A    | G    | 16.1±0.9                       | Type II                                 | Hubei, China                      |
| 925A       | G               | T    | T             | A    | G    | 16.1±1.2                       | Type II                                 | Hubei, China                      |
| g087       | G               | T    | T             | A    | G    | 16.4±1.8                       | Type II                                 | Hubei, China                      |
| g013       | G               | T    | T             | A    | G    | 17.5±2.0                       | Type II                                 | Hubei, China                      |

---

|         |   |   |   |   |   |          |         |              |
|---------|---|---|---|---|---|----------|---------|--------------|
| g157    | G | T | T | A | G | 17.7±1.3 | Type II | Hubei, China |
| HZ165   | G | T | T | A | G | 18.0±0.8 | Type II | Hubei, China |
| g002    | G | T | T | A | G | 18.5±1.5 | Type II | Hubei, China |
| H29A    | G | T | T | A | G | 18.8±0.9 | Type II | Hubei, China |
| WHR     | G | T | T | A | G | 18.9±0.5 | Type II | Hubei, China |
| g051    | G | T | T | A | G | 19.0±1.4 | Type II | Hubei, China |
| g146    | G | T | T | A | G | 19.1±1.0 | Type II | Hubei, China |
| 616A    | G | T | T | A | G | 19.1±0.8 | Type II | Hubei, China |
| 春 R2    | G | T | T | A | G | 19.1±1.3 | Type II | Hubei, China |
| g061    | G | T | T | A | G | 19.4±1.8 | Type II | Hubei, China |
| R11     | G | T | T | A | G | 19.9±0.7 | Type II | Hubei, China |
| g172    | G | T | T | A | G | 20.1±2.7 | Type II | Hubei, China |
| 5148DH  | G | T | T | A | G | 20.3±1.0 | Type II | Hubei, China |
| HS5X    | G | T | T | A | G | 20.6±0.6 | Type II | Hubei, China |
| g075    | G | T | T | A | G | 20.6±1.3 | Type II | Hubei, China |
| 245A    | G | T | T | A | G | 20.9±0.3 | Type II | Hubei, China |
| 987A    | G | T | T | A | G | 20.9±1.1 | Type II | Hubei, China |
| g001    | G | T | T | A | G | 21.1±0.6 | Type II | Hubei, China |
| g064    | G | T | T | A | G | 21.2±1.2 | Type II | Hubei, China |
| g016    | G | T | T | A | G | 21.4±1.5 | Type II | Hubei, China |
| g004    | G | T | T | A | G | 21.7±1.1 | Type II | Hubei, China |
| g015    | G | T | T | A | G | 21.8±1.4 | Type II | Hunan, China |
| HZ168   | G | T | T | A | G | 22.2±1.1 | Type II | Hubei, China |
| ZS11X   | G | T | T | A | G | 23.0±0.5 | Type II | Hubei, China |
| g074    | G | T | T | A | G | 23.1±3.1 | Type II | Hubei, China |
| 195-14A | G | T | T | A | G | 23.2±0.7 | Type II | Hubei, China |
| g158    | G | T | T | A | G | 23.5±2.4 | Type II | Hubei, China |
| 8307R   | G | T | T | A | G | 23.6±0.3 | Type II | Hubei, China |
| g063    | G | T | T | A | G | 24.0±0.1 | Type II | Hubei, China |

---



---

|         |   |   |   |   |   |          |          |                 |
|---------|---|---|---|---|---|----------|----------|-----------------|
| L135R   | G | T | T | A | G | 24.6±0.3 | Type II  | Hubei, China    |
| 7-6R    | G | T | T | A | G | 25.4±0.4 | Type II  | Hubei, China    |
| Y106    | G | T | T | A | G | 26.0±0.7 | Type II  | Hubei, China    |
| g049    | G | T | T | A | G | 26.4±2.3 | Type II  | Hubei, China    |
| g062    | G | T | T | A | G | 26.5±2.2 | Type II  | Hubei, China    |
| Y147    | G | T | T | A | G | 27.5±0.9 | Type II  | Hubei, China    |
| 7-5DH   | G | T | T | A | G | 28.1±0.3 | Type II  | Hubei, China    |
| YY9X    | G | T | T | A | G | 14.0±1.1 | Type II  | Guizhou, China  |
| HY16X   | G | T | T | A | G | 19.7±0.5 | Type II  | Shanghai, China |
| g052    | G | T | T | A | G | 24.2±2.1 | Type II  | Shanghai, China |
| g147    | G | T | T | A | G | 18.0±0.1 | Type II  | Sichuan, China  |
| g050    | G | T | T | A | G | 23.3±3.4 | Type II  | Sichuan, China  |
| g088    | G | T | T | A | G | 23.7±1.7 | Type II  | Sichuan, China  |
| g014    | G | T | T | A | G | 23.4±1.6 | Type II  | Yunnan, China   |
| g110    | G | T | T | A | G | 24.3±2.7 | Type II  | Yunnan, China   |
| ZY50X   | G | T | T | A | G | 17.4±0.3 | Type II  | Zhejiang, China |
| 2013ZL6 | G | T | T | A | G | 21.0±0.6 | Type II  | Zhejiang, China |
| ZS72X   | G | T | T | A | G | 21.8±0.8 | Type II  | Zhejiang, China |
| g121    | G | T | T | A | G | 14.9±0.7 | Type II  | Europe          |
| g026    | G | T | T | A | G | 15.8±0.5 | Type II  | Europe          |
| g025    | G | T | T | A | G | 20.1±1.4 | Type II  | Europe          |
| g181    | G | T | T | A | G | 20.4±1.0 | Type II  | Europe          |
| g148    | G | T | T | A | G | 21.4±1.7 | Type II  | Europe          |
| g122    | G | T | T | A | G | 25.8±0.5 | Type II  | Europe          |
| wester  | A | T | T | A | G | 16.7±1.1 | Type III | Australia       |
| g040    | A | T | T | A | G | 20.2±1.9 | Type III | Australia       |
| g038    | A | T | T | A | G | 23.0±0.9 | Type III | Canada          |
| g073    | A | T | T | A | G | 23.8±2.0 | Type III | Hubei, China    |
| MY12X   | A | T | T | A | G | 23.1±0.4 | Type III | Sichuan, China  |

---

---

|      |   |   |   |   |   |          |          |              |
|------|---|---|---|---|---|----------|----------|--------------|
| g145 | A | T | T | A | G | 24.9±0.8 | Type III | Europe       |
| HZX  | G | C | C | G | A | 25.5±1.4 | Type IV  | Hubei, China |

---

468 <sup>a</sup>*qSS.C9* haplotype is determined and grouped by sequencing the promoter region and  
 469 gene region of *qSS.C9* in the accessions. Data are given as mean ± s.e.m.

470  
 471  
 472  
 473  
 474  
 475  
 476  
 477  
 478  
 479  
 480  
 481  
 482  
 483  
 484  
 485  
 486  
 487  
 488  
 489  
 490  
 491  
 492  
 493  
 494

495 **Supplementary Table S10.** Number of seeds per silique in three haplotypes.

| <i>qSS.C9</i> haplotype | Range     | Mean $\pm$ s.e.m | <i>P</i> values       |                    |
|-------------------------|-----------|------------------|-----------------------|--------------------|
| Haplotype I (n=8)       | 9.6-18.2  | 13.8 $\pm$ 1.0   |                       |                    |
| Haplotype II (n=69)     | 10.6-28.1 | 20.4 $\pm$ 0.4   | 9.72E-05 <sup>a</sup> |                    |
| Haplotype III (n=6)     | 16.7-24.9 | 22.0 $\pm$ 1.2   | 0.000384 <sup>b</sup> | 0.277 <sup>c</sup> |

496 *P* values were generated by a two-tailed Student's t test. <sup>a</sup>, <sup>b</sup> and <sup>c</sup> indicate the *P* value  
 497 calculated, respectively, between Haplotype I and Haplotype II, Haplotype I and  
 498 Haplotype III, and Haplotype II and Haplotype III. Data are given as mean  $\pm$  s.e.m.

499

500

501

502

503

504

505

506

507

508

509

510

511

512

513

514

515

516

517

518

519

520 **Supplementary Table S11.** Quantitative analysis of initial ovule number and number  
 521 of seeds per silique in 15 *B. napus* germplasms.

| Accessions | NO of ovule initiation  | Number of seeds | Proportion of abortion | <i>P</i> values |
|------------|-------------------------|-----------------|------------------------|-----------------|
|            |                         | per silique     | ovule numbers (%)      |                 |
| Westar     | 23.6±0.6 <sup>a</sup>   | 16.7±0.9        | 29.2%                  | 8E-06           |
| ZS4R       | 23.8±0.2 <sup>a</sup>   | 21.4±0.8        | 10.1%                  | 6E-04           |
| ZY50X      | 26.0±0.4 <sup>b</sup>   | 18.7±0.7        | 28.1%                  | 2E-09           |
| HY15X      | 26.3±0.2 <sup>bc</sup>  | 22.5±0.3        | 14.5%                  | 6E-09           |
| HZ165      | 27.4±0.4 <sup>bcd</sup> | 18.4±0.5        | 32.8%                  | 2E-12           |
| 195A-14    | 27.6±0.4 <sup>cd</sup>  | 24.9±0.5        | 9.8%                   | 1E-04           |
| ZS11X      | 28.1±0.6 <sup>d</sup>   | 27.7±0.6        | 3.9%                   | 0.728           |
| HZ168      | 28.3±0.4 <sup>d</sup>   | 21.7±0.9        | 23.3%                  | 3E-09           |
| 7-6        | 28.5±0.4 <sup>d</sup>   | 26.6±0.3        | 6.7%                   | 5E-04           |
| R5200      | 28.6±0.3 <sup>d</sup>   | 26.0±0.4        | 9.1%                   | 3E-04           |
| Y106       | 30.2±0.5 <sup>e</sup>   | 26.0±0.4        | 13.9%                  | 1E-06           |
| 80-5213    | 30.6±0.4 <sup>e</sup>   | 23.0±0.9        | 24.8%                  | 1E-05           |
| 80-5215    | 30.7±0.4 <sup>e</sup>   | 29.2±0.7        | 4.9%                   | 0.239           |
| 80-5214    | 31.1±0.4 <sup>e</sup>   | 22.1±0.8        | 28.9%                  | 2E-07           |
| 7-5DH      | 32.4±0.6 <sup>f</sup>   | 26.2±1.0        | 19.1%                  | 5E-06           |

522 <sup>a</sup> Different alphabetical letters following means indicate significant differences  
 523 (*P*=0.01). Data are given as mean ± s.e.m. *P* values were generated by a two-tailed  
 524 Student's *t* test.

525

526

527

528

529

530

531

532 **Supplementary Table S12.** Summary of primers used in this study.

| Primer name | Sequence 5'-3'                                  | Purpose                                                                                      |
|-------------|-------------------------------------------------|----------------------------------------------------------------------------------------------|
| SCC9-136L   | CGTCAAGCCAATAGCAGAATCG                          | fine mapping                                                                                 |
| SCC9-136R   | CTTGGTGGCGTGTTCCTTGTC                           |                                                                                              |
| SRC9-298L   | TCCACCTTCGGATTCTCCTCTCT                         | fine mapping                                                                                 |
| SRC9-298R   | TGTCTTCTTCTGTTCACCGCCACT                        |                                                                                              |
| STC9-114L   | ATGGTTCTGCCTCGAAAAGCAAC                         | fine mapping                                                                                 |
| STC9-114R   | GAGATGAACTCCCAACAATTGCC                         |                                                                                              |
| SRC9-397L   | GGTTTTGGCACACGGATTAAGAAACA                      | fine mapping and BAC screening                                                               |
| SRC9-397R   | CGTGCTAAGCATGGGGTAATAACT                        |                                                                                              |
| STC9-108L   | ATCGGTGTTTCAGTTACAGG                            | fine mapping and BAC screening                                                               |
| STC9-108R   | CGAAATCCACGTAACAATTC                            |                                                                                              |
| STC9-164L   | CAACCCTACAAAGATGAGCTAAGACG                      | fine mapping and the <i>BnaC9.SMG7b</i> and<br><i>BnaC9.SMG7c</i> homologous copies analysis |
| STC9-164R   | TGGATGATGACTTTGACAGATGG                         |                                                                                              |
| STC9-271L   | CATGATTACGAATTCGAGCTCGGTACCCTTACAAGTAGAGCATGGAC | <i>BnaC9.SMG7b</i> Complementation test                                                      |
| STC9-271R   | TGCCTGCAGGTCGACTCTAGATAACTGAGGTTGAGCTGGCTCCTCG  |                                                                                              |
| SWC9-012L   | ATTTGAAAAATCTCAGAATTCCTTCTCTGCGTTCCACCTCCAGAT   | <i>BnaC9.RING</i> Complementation test                                                       |
| SWC9-012R   | GGTCTTAATTAACTCTCTAGACTTGCCGACCGGTGAAGTAGTCTCT  |                                                                                              |
| C9RNAi-2L   | TTACCGCTCCCAAAGACTCG                            | <i>BnaC9.SMG7b</i> RNAi test                                                                 |
| C9RNAi-2R   | GGGTAAAAAGAATCCCGTTGAG                          |                                                                                              |
| STC9-175L   | TTTGGCGCGCCGGTAAAACCCCATGTTGCTTC                | Pro <sub><i>BnaC9.SMG7b</i></sub> -GUS construction                                          |
| STC9-175R   | CGGGGTACCCTTACAAGTAGAGCATGGAC                   |                                                                                              |
| STC9-368L   | GGAGAGGACAGGGTACCCGGGATGGAGAGGGAGATTCTAAGAACCG  | <i>BnaC9.SMG7b</i> - GFP and <i>BnaC9.SMG7c</i> -GFP<br>construction                         |
| STC9-368R   | GGCAGCGGCAGCAGCCGGATCCCAAAAAATCATATCTTCCGTTAAGC |                                                                                              |
| STC9-391L   | ATCAGTGATAGGGATAGATCTGGATGTCTCAAACGGGAAGATAATC  | AtDCP1-RFP construction                                                                      |
| STC9-391R   | ACCTGGTGCTCCGCCAGATCTTTGTTGAAGTGCATTTTGTAAGTTC  |                                                                                              |
| STC9-300L   | AGGACACAAGCAGAGTTTAAGC                          | qPCR analysis of <i>BnaC9.SMG7b</i> expression                                               |
| STC9-300R   | TTGGATCAGAAGGATTCCGAGC                          |                                                                                              |
| STC9-333L   | CGGCTGATCGGTGGCACTGTTG                          | RT-PCR analysis of <i>BnaC9.SMG7c</i> expression                                             |
| STC9-333R   | AAGGATTCCGAGGGTGGACACG                          |                                                                                              |
| STC9-043L   | AGATGCTCAAAGCATTCTGCG                           | qPCR analysis of <i>BnaC9.SMG7b</i> expression in<br>RNAi-transformed plants                 |
| STC9-043R   | CTCGTAGACTGCTGCTAGTGGA                          |                                                                                              |
| STC9-452L   | GGCTCAACCTTAGATTCACAGA                          | qPCR analysis of <i>BnaA05g23660D</i> expression                                             |
| STC9-452R   | GTATCTAACTGCTAGGATCGCG                          |                                                                                              |
| STC9-455L   | CCCTTTGCGCCAGTTCATCTAG                          | qPCR analysis of <i>BnaC04g40810D</i> expression                                             |
| STC9-455R   | CATAGGCCACACTGAGCTAAGC                          |                                                                                              |
| STC9-457L   | GTTGGGCTCAAGTTGACAGGCA                          | qPCR analysis of <i>BnaC06g12460D</i> expression                                             |
| STC9-457R   | GGTGTAAGCTCATTGGAAATGACC                        |                                                                                              |
| STC9-458L   | CTAACTGCTGCTCAAGCCCTTC                          | qPCR analysis of <i>BnaC07g16820D</i> expression                                             |
| STC9-458R   | TCTCTGCCTCGTCGAGTGTG                            |                                                                                              |
| STC9-460L   | GAGCTTTGCTTCCGGTGTGGA                           | qPCR analysis of <i>BnaC08g07580D</i> expression                                             |
| STC9-460R   | ACAACCTCCGTTAGCCGAAGGG                          |                                                                                              |
| STC9-463L   | GGGTTTCGATGCCAATTGCCAAG                         | qPCR analysis of <i>BnaA01g04500D</i> expression                                             |
| STC9-463R   | GCAATAAGCCGATAACCATTGAC                         |                                                                                              |

---

|           |                          |                                           |
|-----------|--------------------------|-------------------------------------------|
| STC9-465L | GCCTGCTCATGTAGTCATATGC   |                                           |
| STC9-465R | GCTCGAACAAGATCCTTGAGC    | qPCR analysis of BnaA02g32320D expression |
| STC9-467L | AGAAGCCGTGTCCGCCTAAAGC   |                                           |
| STC9-467R | CCCAAACCTTAGGGTGTGGA     | qPCR analysis of BnaA04g11970D expression |
| STC9-469L | TTGGCTGAGATCGGTCGTTACAC  |                                           |
| STC9-469R | GGCAGAAGCAGCCACTTTACCG   | qPCR analysis of BnaC03g32600D expression |
| STC9-471L | CGATCGACGGCTATTACATTCCA  |                                           |
| STC9-471R | TCCTTTCCCGGCGCTAAAC      | qPCR analysis of BnaC05g00670D expression |
| STC9-198L | GAGGAATCTACCAAGGAG       |                                           |
| STC9-198R | GAGCGGAGATTCTAGATCC      | qPCR analysis of BnTAM expression         |
| STC9-206L | GGATTCAAGAAGAAGCTGAG     |                                           |
| STC9-206R | CTTCTCTTGCTCGACAGTC      | qPCR analysis of BnTDM1 expression        |
| STC9-340L | GCATGAGACTCTTACCTCACAATG |                                           |
| STC9-340R | CCTAGGATGCCAATAGTCCTCG   | qPCR analysis of BnCYCB3;1 expression     |
| STC9-342L | CAGAGGCGAGAGACCGATTG     |                                           |
| STC9-342R | GCGAACTGGATGTTCGAACAC    | qPCR analysis of BnOSD1 expression        |
| STC9-348L | CAATGTTCTGCAATGGAGCTTC   |                                           |
| STC9-348R | CTTCAATTCTGGTGGCCAGAG    | qPCR analysis of BnSDS expression         |
| STC9-414L | CTTGTGGCACTATACTGCGACG   |                                           |
| STC9-414R | GGCCTTCCCAACTTTCACAAGC   | qPCR analysis of BnJASON expression       |
| STC9-417L | CCCCAAACACTCGCTGTTAG     |                                           |
| STC9-417R | CACTCTGTGGTCCGGACCTG     | qPCR analysis of BnPS1 expression         |
| STC9-418L | ATGTACCAACCTCGGAGCAAGG   |                                           |
| STC9-418R | GGGAACCGAGAAGCTCTATAGC   | qPCR analysis of BnMMD1 expression        |
| STC9-420L | GAATCGTTCGAGGTCGATGAG    |                                           |
| STC9-420R | GCAGTACTCGATAACCTTGCGG   | qPCR analysis of BnSKP1 expression        |
| STC9-423L | TGGCTGCTAAGTACAAGTGGGC   |                                           |
| STC9-423R | CATTCCCTTACGCTGGTCTG     | qPCR analysis of BnMEI1 expression        |
| STC9-424L | AGGCTGGAAGACAGTGAAACCAG  |                                           |
| STC9-424R | TAGCTCCTTGGCGTCCCC       | qPCR analysis of BnPRD3 expression        |
| STC9-427L | GGAGGCAAAGATCCTCATGATG   |                                           |
| STC9-427R | TCCGCCACTTGAATTCTCTGC    | qPCR analysis of BnCOM1 expression        |
| STC9-428L | CTCTTCGCCGAGTGGTAGAG     |                                           |
| STC9-428R | GAACTGCAGCATTACATACATGG  | qPCR analysis of BnMCM8 expression        |
| STC9-432L | GACTCAGTCATGGAAGTACCATTG |                                           |
| STC9-432R | TCTACCCATTGGTGTGGCACAC   | qPCR analysis of BnMSH5 expression        |
| STC9-434L | GTCTTACATTCTCCAAGGCGTTG  |                                           |
| STC9-434R | GACGACTGTATGTGCAGGCAG    | qPCR analysis of BnMER3 expression        |
| STC9-437L | CACCGTCAGCTGATGATAAGACC  |                                           |
| STC9-437R | CGTGTGCAATCCTAGCTTCATGG  | qPCR analysis of BnSHOC1 expression       |
| STC9-438L | AAGCCCGTCCATTTCCAC       |                                           |
| STC9-438R | GGAGAAATCCAGCCATCGCC     | qPCR analysis of BnHEI10 expression       |
| STC9-441L | CACTCCGATGAGCAGCAATG     |                                           |
| STC9-441R | CGCTTCGAGTACTGCAGGATAG   | qPCR analysis of BnASY1 expression        |

---

---

|            |                         |                                                          |
|------------|-------------------------|----------------------------------------------------------|
| STC9-442L  | CAACGAGAATGCTAAGCTCAGG  | qPCR analysis of BnZYP1 expression                       |
| STC9-442R  | CAGCTTCTTGAACCTGAGAAGCC |                                                          |
| STC9-445L  | GCCAGTGACCACTCACACAGAC  | qPCR analysis of BnSYN1 expression                       |
| STC9-445R  | GTAGAAGAGTTGAGCTGCAGCG  |                                                          |
| STC9-379L  | AAGAGGTGGCCTGGATGGCCG   | RT-PCR/qPCR analysis of BnaA03g28670D ±PTC transcription |
| STC9-379R  | GCATGAAATGTAAGGCACGG    |                                                          |
| STC9-380L  | AAGAGGTGGCCTGGATGGCCG   | RT-PCR/qPCR analysis of BnaA03g28670D -PTC transcription |
| STC9-380R  | GGTAGAGATGATTCGGGCTCTTC |                                                          |
| BnACTIN7-L | CCCTGGAATTGCTGACCGTA    | RT-PCR/qPCR control for <i>B. napus</i>                  |
| BnACTIN7-R | TGGAAAGTGCTGAGGGATGC    |                                                          |

---

533
